# Supplementary material for: Synthesis of planar chiral (1,3-disubstituted arene)Mn(CO)3+ cations via addition of nucleophiles to (oxocyclohexadienyl)Mn(CO)3 in the presence of chiral ligandsElectronic supplementary information (ESI) available: experimental section. See http://www.rsc.org/suppdata/cc/b2/b201341j/
Source: Royal Society of Chemistry journal article supplement (doi:10.1039/b201341j), 2002-05-07
Supplement: b201341j.doc [file b201341j.doc]

# Supplementary Material (ESI) for Chemical Communications

# This journal is © The Royal Society of Chemistry 2002

Synthesis of Planar Chiral (1,3-Disubstituted Arene)Mn(CO)3+ Cations via Addition of Nucleophiles to (Oxocyclohexadeinyl)Mn(CO)3 in the Presence of Chiral Ligand

Seung Uk Son, Kang Hyun Park, Seung Jung Lee, Hwimin Seo, and

Young Keun Chung*

School of Chemistry and Center for Molecular Catalysis, Seoul National University, Seoul 151-747, Korea

Synthesis and characterization of new compounds.

**Synthesis of 1**. To the solution (*p*-cresol)Mn(CO)3+BF4- of (1.0 g, 3.0 mmol) in 15 ml of THF at -78 C was added *t*-BuOK (0.40 g, 3.5 mmol). The solution was allowed to warm to room temperature for 1 h. After the solution was filtered over celite, the filtrate was chromatographed on a silica gel column eluting with ethyl acetate and acetone (v/v, 1:2). Removal of the solvent gave **1** in 74% yield (0.56g). **1** IR CO 2036, 1966 cm-1; 1H NMR (CDCl3):  5.93 (br, 2 H), 4.81 (br, 2 H), 2.30 (s, 3 H) ppm; Anal. Cacld. C10H7MnO4: C, 48.81; H, 2.87. Found: C, 48.35; H, 2.85

# Synthesis of 2b

To a solution of 15 ml of dichloromethane was added (S)-binaphthol (0.176 g, 0.61 mmol). The ssolution was cooled to -78oC. To the solution was added 2-thienylmagnesium bromide (1.83 ml, 1.83 mmol, 1.0 M in diethyl ether). After the solution was stirred for 1 h, **1** (0.10 g, 0.40 mmol) was added to the solution. The solution was stirred for 18 h. After acetic anhydride (0.5 ml) was added to the solution, then the solution was allowed to warm to rt. After the solution was stirred at rt for 3 h, water (0.1 ml) was added to the solution. After the solution was stirred for 10 min, anhydrous MgSO4 (1.0 g) was added to remove water. Filtration followed by concentration and chromatography on a silica gel column eluting with hexane and diethyl ether (v/v, 20:1) yielded the product in 68% yield (0.102 g, 0.267 mmol).  IR CO 2010, 1921 cm-1; 1H NMR (CDCl3, 300 MHz):  7.00 (d, 4.4 Hz, 1 H), 6.75 (dd, 3.5, 4.7 Hz, 1 H), 6.50 (d, 3.3 Hz, 1 H), 5.45 (d, 3.1 Hz, 1 H), 5.07 (d, 4.5 Hz, 1 H), 4.54 (d, 6.1 Hz, 1 H), 3.52 (d, 5.0 Hz, 1 H), 1.99 (s, 3 H), 1.87 (s, 3 H) ppm; 13C NMR (CDCl3):  221.09, 168.52, 126.52, 125.87, 124.33, 123.09, 109.12, 102.16, 87.16, 73.81, 60.62, 42.34, 21.96, 21.37 ppm; HRMS m/z (M+); calcd. 371.9864, obsd. 371.9866. [] –20 (c 0.14, Et2O).

**2c.** IR CO 2010, 1923 cm-1; 1H NMR (CDCl3, 300 MHz):  7.23 (m, 3 H), 6.92 (d, 6.8 Hz, 2 H), 5.45 (d, 4.5 Hz, 1 H), 5.19 (d, 5.5 Hz, 1 H), 4.46 (d, 5.4 Hz, 1 H), 3.53 (d, 4.8 Hz, 1 H), 2.05 (s, 3 H), 1.92 (s, 3 H) ppm; Anal. Calcd. for C18H15MnO5: C, 59.03; H, 4.13. Found: C, 58.80; H, 4.13; [] –111 (c 0.17, Et2O).

**2d.** IR CO 2010, 1921 cm-1; 1H NMR (CDCl3, 300 MHz):  7.03 (d, 7.9 Hz, 2 H), 6.81 (d, 7.9 Hz, 2 H), 5.46 (d, 5.9 Hz, 1 H), 5.18 (d, 5.9 Hz, 1 H), 4.41 (d, 6.1 Hz, 1 H), 3.54 (d, 6.2 Hz, 1 H), 2.04 (s, 3 H), 1.90 (s, 3 H) ppm; 13C NMR (CDCl3, 75 MHz):  222.4, 168.6, 141.7, 137.0, 129.9, 129.0, 125.9, 121.2, 108.9, 102.6, 87.5, 73.0, 61.4, 47.0, 22.1, 21.4, 20.9 ppm; HRMS m/z (M+) calcd. 380.0457, obsd. 380.0456; [] –86 (c 0.08, Et2O).

**2e.** IR CO 2010, 1921 cm-1; 1H NMR (CDCl3, 300 MHz):  6.84 (d, 8.6 Hz, 2 H), 6.73 (d, 8.6 Hz, 2 H), 5.46 (d, 5.7 Hz, 1 H), 5.17 (d, 5.8 Hz, 1 H), 4.37 (d, 6.0 Hz, 1 H), 3.74 (s, 3 H), 2.04 (s, 3 H), 1.91 (s, 3 H) ppm; 13C NMR (CDCl3, 75 MHz):  222.4, 168.6, 158.8, 137.3, 127.2, 113.7, 108.9, 103.2, 87.5, 72.9, 61.9, 55.2, 46.9, 22.1, 21.4 ppm; HRMS m/z (M+) calcd. 396.0406, obsd. 396.0403; [] –46 (c 0.08, Et2O).

**2f.** IR CO 2010, 1924 cm-1; 1H NMR (CDCl3, 300 MHz):  8.11 (d, 8.4 Hz, 1 H), 7.81 (d, 8.0 Hz, 1 H), 7.69 (d, 8.1 Hz, 1 H), 7.54 (t, 8.4 Hz, 1 H), 7.37 (dd, 7.4, 8.1 Hz, 1 H), 7.05 (d, 7.1 Hz, 1 H), 5.45 (d, 5.9 Hz, 1 H), 5.41 (d, 5.9 Hz, 1 H), 5.28 (d, 6.0 Hz, 1 H), 3.74 (d, 6.0 Hz, 1 H), 1.95 (s, 3 H), 1.84 (s, 3 H) ppm; Anal. Calcd. for C22H17MnO5: C, 63.47; H, 4.12. Found: C, 63.56; H, 4.12; [] –77 (c 0.30, Et2O).

**2g.** IR CO 2010, 1920 cm-1; 1H NMR (CDCl3, 300 MHz):  5.41 (d, 4.3 Hz, 1 H), 5.01 (d, 4.8 Hz, 1 H), 3.32 (d, 4.8 Hz, 1 H), 3.08 (m, 1 H), 2.01 (s, 3 H), 1.85 (s, 3 H), 1.14 – 0.70 (m, 6 H), 0.81 (t, 7.03 (d, 7.9 Hz, 2 H), 6.81 (6.3 Hz, 3 H) ppm; 13C NMR (CDCl3, 75 MHz):  222.5, 169.2, 108.8, 102.2, 87.5, 73.7 59.4, 43.0, 39.6, 26.9, 22.4, 22.0, 21.4, 13.9 ppm; HRMS m/z (M+) calcd. 346.0614, obsd. 346.0613; [] –88 (c 0.11, Et2O).

**Synthesis of 3b.** To the solution of **2** (0.100 g, 0.273 mmol) in 10 ml of CH2Cl2 at **–**78 C was added HBF4·OMe2 (0.050 ml, 0.410 mmol). After the solution was stirred for 2 h, the solution was allowed to warm to rt, the solution was stirred at rt for 1 h. To the solution was added K2CO3 (0.100 g, 0.727 mmol). After the resulting solution was stirred for 30 min, the solution was filtered off on celite and the filtrate was evaporated to dryness. Recrystallization of the crude solid by nitromethane and diethyl ether gave **3b** in 98% yield (0.105g, 0.268 mmol). IR CO 2080, 2016 cm-1; 1H NMR (CD3NO2, 300 MHz):  7.95 (d, 7.4 Hz, 2 H), 7.70 (m, 3 H), 6.96 (t, 6.8 Hz, 1 H), 6.84 (s, 1 H), 6.79 (d, 6.8 Hz, 1 H), 6.38 (d, 6.6 Hz, 1 H), 2.70 (s, 3 H) ppm; [] –15 (c 0.37, CH3COCH3) 97% ee; Anal. Cacld. for C16H12BF4MnO3: C, 48.77; H, 3.07. Found: C, 48.48; H, 3.05.

**3a**. IR CO 2068, 2014 cm-1; 1H NMR (CD3NO2, 300 MHz):  7.92 (d, 3.8 Hz, 1 H), 7.86 (d, 3.9 Hz, 1 H), 7.31 (dd, 3.82, 3.86 Hz, 1 H), 6.90 (t, 6.7 Hz, 1 H), 6.70 (s, 1 H), 6.65 (d, 6.7 Hz, 1 H), 6.22 (d, 6.8 Hz, 1 H), 2.64 (s, 3 H) ppm; [] –24 (c 0.26, CH3COCH3) 98% ee; Anal. Calcd for C14H10BF4MnO3S: C, 42.04; H, 2.52; S, 8.01. Found: C, 41.96; H, 2.48; S, 8.29.

**Determination of enantio-purities of 2b, 2c, 2d, 2e, 2f, and 2g.**

The ee values of all compounds were determined by HPLC (chiralcel OD column; the flow rate = 0.5mL/min, eluents of **2b** ; hexane: isopropanol = 95:5, **2c** ; hexane: isopropanol = 95:5, **2d** ; hexane: isopropanol = 99:1, **2e** ; hexane: isopropanol = 95:5, **2f** ; hexane: isopropanol = 95:5, **2g** ; hexane: isopropanol = 99:1.)

**Determination of enantio-purities of 3a and 3b.**

Due to unstability and insolubility of **3a** and **3b** in deuterated polar organic solvents, neither the use of the europium shift reagent nor the HPLC was successful to determine ee values. Thus, we prepared neutral derivatives **3a’** and **3b’** bythe nucleophilic addition of anisolyl anion to **3a** and **3b**, respectively, and measured their ee values.

To a 10 mL solution of THF at 0 C were added **3b** (0.10 g, 0.25 mmol) and *4*-MeOC6H4MgBr (0.38 mmol). The resulting solution was stirred for 2 h and was quenched with diethyl ether and aqueous NH4Cl solution. The ethereal extract was dried over anhydrous MgSO4, evaporated to dryness, and chromatographed on a silica gel column eluting with hexane and diethyl ether (v/v, 20:1). The yield of **3b’** was 89 %. According to the 1H NMR spectrum of the product, the nucleophile added exclusively to the carbon, which was situated at the meta to the phenyl and the methyl group. IR CO 2009, 1925 cm-1; 1H NMR (CDCl3, 300 MHz):  7.52 (m, 2 H), 7.34 (m, 3 H), 6.87 (d, 8.5 Hz, 2 H), 6.73 (d, 8.3 Hz, 2 H), 6.06 (s, 1 H), 3.97 (dd, 5.4, 4.8 Hz, 1 H), 3.87 (d, 5.4 Hz, 1 H), 3.73 (s, 3 H), 3.51 (d, 4.8 Hz, 1H), 2.00 (s, 3 H) ppm; 13C NMR (CDCl3, 75 MHz):  222.8, 158.3, 140.6, 137.2, 129.3, 128.9, 128.4, 127.3, 126.7, 113.7, 111.5, 109.1, 80.4, 60.9, 55.2, 54.5, 41.3, 22.8 ppm; HRMS m/z (M+) calcd. 414.0663, obsd. 414.0662. The ee value (98%) was determined by HPLC (chiralcel OD column; hexane: isopropanol = 99:1, the flow rate = 0.5mL/min; the retention time of the minor, 9.225 min and the retention time of the major, 13.554 min).

In the same way as the above, **3a’** was prepared. IR CO 2011, 1922 cm-1; 1H NMR (CDCl3, 300 MHz):  7.28 (d, 3.9 Hz, 1 H), 7.26 (d, 3.9 Hz, 1 H), 6.98 (t, 3.9 Hz, 1 H), 6.87 (d, 8.6 Hz, 2 H), 6.73 (d, 8.6 Hz, 2 H), 6.10 (s, 1 H), 3.93 (m, 2 H), 3.73 (s, 3 H), 3.47 (d, 6.8 Hz, 1 H), 1.98 (s, 3H) ppm; 13C NMR (CDCl3, 75 MHz):  222.5, 158.2, 141.4, 140.4, 127.7, 127.5, 126.6, 126.4, 125.2, 113.7, 108.9, 105.9, 78.5, 60.9, 55.2, 53.6, 41.1, 22.7 ppm; HRMS m/z (M+) calcd. 420.0228, obsd. 420.0226. The ee value (97%) was determined by HPLC (chiralcel OD column; hexane: isopropanol = 99:1; the flow rate = 0.5/min; the retention time of the minor, 10.425 min and the retention time of the major, 10.800 min).
